# Supplementary material for: Urban Green Space and Subjective Well-Being of Older People: A Systematic Literature Review
Source: MDPI journal article supplement (doi:10.3390/ijerph192114227), 2022-10-31
Supplement: s1 [file s1]

**Supplementary File S1:** Study characteristics for the first research theme.

| First research theme (About UGS characteristics and SWB) |                                                                         |                             | Articles |            |
|----------------------------------------------------------|-------------------------------------------------------------------------|-----------------------------|----------|------------|
|                                                          |                                                                         |                             | Number   | Percentage |
| Region                                                   | Europe                                                                  |                             | 24       | 48%        |
|                                                          | Asia                                                                    |                             | 11       | 22%        |
|                                                          | America                                                                 |                             | 10       | 20%        |
|                                                          | Oceania                                                                 |                             | 5        | 10%        |
|                                                          | Total                                                                   |                             | 50       | 100%       |
| Research content                                         | Spatial characteristics                                                 |                             | 19       | 38%        |
|                                                          | Green characteristics                                                   |                             | 15       | 30%        |
|                                                          | Grey characteristics                                                    |                             | 9        | 18%        |
|                                                          | Spatial characteristics、<br>Green characteristics、 Grey characteristics |                             | 4        | 8%         |
|                                                          | Spatial characteristics、 Green characteristics                          |                             | 1        | 2%         |
|                                                          | Green characteristics、 Grey characteristics                             |                             | 1        | 2%         |
|                                                          | Spatial characteristics、 Grey characteristics                           |                             | 1        | 2%         |
|                                                          | Total                                                                   |                             | 50       | 100%       |
|                                                          |                                                                         |                             |          |            |
| Research method                                          | Quantitative                                                            | survey                      | 12       | 68%        |
|                                                          |                                                                         | questionnaire               | 10       |            |
|                                                          |                                                                         | Regression analysis         | 7        |            |
|                                                          |                                                                         | Cross-sectional             | 5        |            |
|                                                          | Qualitative                                                             | bibliometric method         | 7        | 30%        |
|                                                          |                                                                         | Case study                  | 2        |            |
|                                                          |                                                                         | Interviews                  | 5        |            |
|                                                          |                                                                         | Meta analysis               | 1        |            |
|                                                          | Mixed method                                                            | Social prescribing approach | 1        | 2%         |
| Total                                                    |                                                                         |                             | 50       | 100%       |

**Supplementary File S2:** Study characteristics for the second research theme.

| Second research theme (About UGS characteristics and SWB) |              |                       | Articles |            |
|-----------------------------------------------------------|--------------|-----------------------|----------|------------|
|                                                           |              |                       | Number   | Percentage |
| Region                                                    | Europe       |                       | 5        | 48%        |
|                                                           | Asia         |                       | 3        | 22%        |
|                                                           | America      |                       | 3        | 20%        |
|                                                           | Oceania      |                       | 4        | 10%        |
|                                                           | Total        |                       | 15       | 100%       |
| Research method                                           | Quantitative | Survey                | 5        | 80%        |
|                                                           |              | Questionnaire         | 3        |            |
|                                                           |              | Cohort study          | 1        |            |
|                                                           |              | Cross-sectional       | 1        |            |
|                                                           |              | Longitudinal Study    | 1        |            |
|                                                           |              | Ordinal regression    | 1        |            |
|                                                           | Qualitative  | Review                | 1        | 20%        |
|                                                           |              | Case study            | 1        |            |
|                                                           |              | Bibliometric approach | 1        |            |
|                                                           |              | Total                 | 15       | 100%       |
